# Supplementary material for: A “turn-off” fluorescent sensor for the selective and sensitive detection of copper(ii) ions using lysozyme stabilized gold nanoclusters
Source: Royal Society of Chemistry journal article supplement (doi:10.1039/c6ra08325k), 2016-01-01
Supplement: c6ra08325k1.pdf [file c6ra08325k1.pdf]

### Supportive information

#### A “turn-off” fluorescent sensor for the selective and sensitive detection of copper (II) ions using lysozyme stabilized gold nanoclusters

Krishnamoorthy Shanmugaraj and Malaichamy Ilanchelian\*  
Department of Chemistry,  
Bharathiar University, Coimbatore – 641046, Tamil Nadu, India.

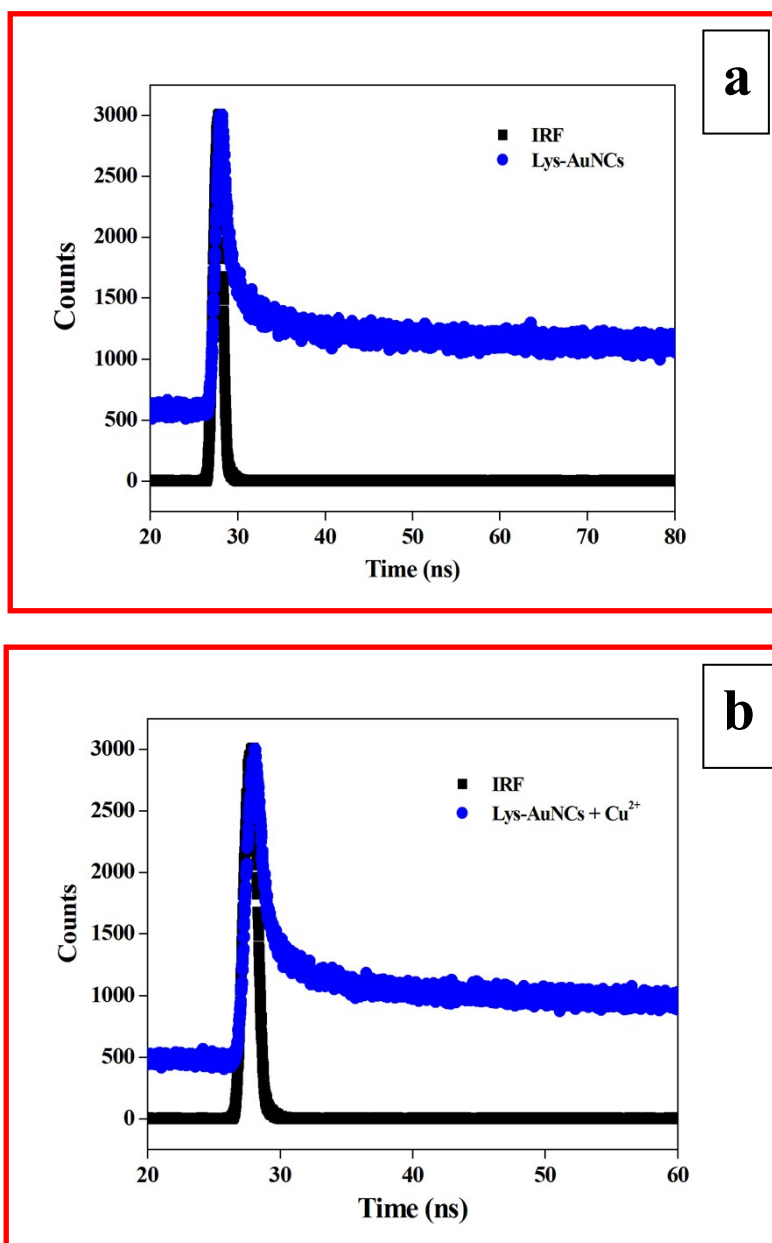

**Fig. S1.** Fluorescence decay curve of (a) Lys-AuNCs and (b) Lys-AuNCs in presence of Cu<sup>2+</sup> ions. The excitation wavelength was tuned to 390 nm and emission was collected at 660 nm. (IRF means instrument response function).
